# Supplementary material for: Influence of vanadium doping on the electrochemical performance of nickel oxide in supercapacitors
Source: Royal Society of Chemistry journal article supplement (doi:10.1039/c3cp52498a), 2013-01-01
Supplement: c3cp52498a.pdf [file c3cp52498a.pdf]

Electronic Supplementary Material (ESI) for Physical Chemistry Chemical Physics (PCCP)  
This journal is © The Royal Society of Chemistry 2013

# **Influence of Vanadium Doping on Electrochemical Performance of Nickel Oxide in Supercapacitors**

Hae Woong Park,<sup>a</sup> Byung-Ki Na,<sup>b</sup> Byung Won Cho,<sup>c</sup> Sun-Min Park<sup>a</sup> and Kwang Chul Roh<sup>\*a</sup>

<sup>a</sup>*Energy Efficient Materials Team, Energy & Environmental Division, Korea Institute of Ceramic Engineering & Technology, 233-5 Gasan-dong, Gueancheon-gu, Seoul 153-801, Republic of Korea. Fax: +82 2 3282 2475; Tel: +82 2 3282 2463; E-mail: rkc@kicet.re.kr*

<sup>b</sup>*Department of Chemical Engineering, Chungbuk National University, 52 Naesudong-ro, Heungdeok-gu, Cheongju, Chungbuk 361-763, Republic of Korea*

<sup>c</sup>*Center for Energy Convergence, Korea Institute of Science and Technology (KIST), P.O. Box 131, Cheongryang, Seoul 130-650, Republic of Korea*

**\*Corresponding author: E-mail address: rkc@kicet.re.kr (K.C. Roh)**

## 1. Supplementary Results

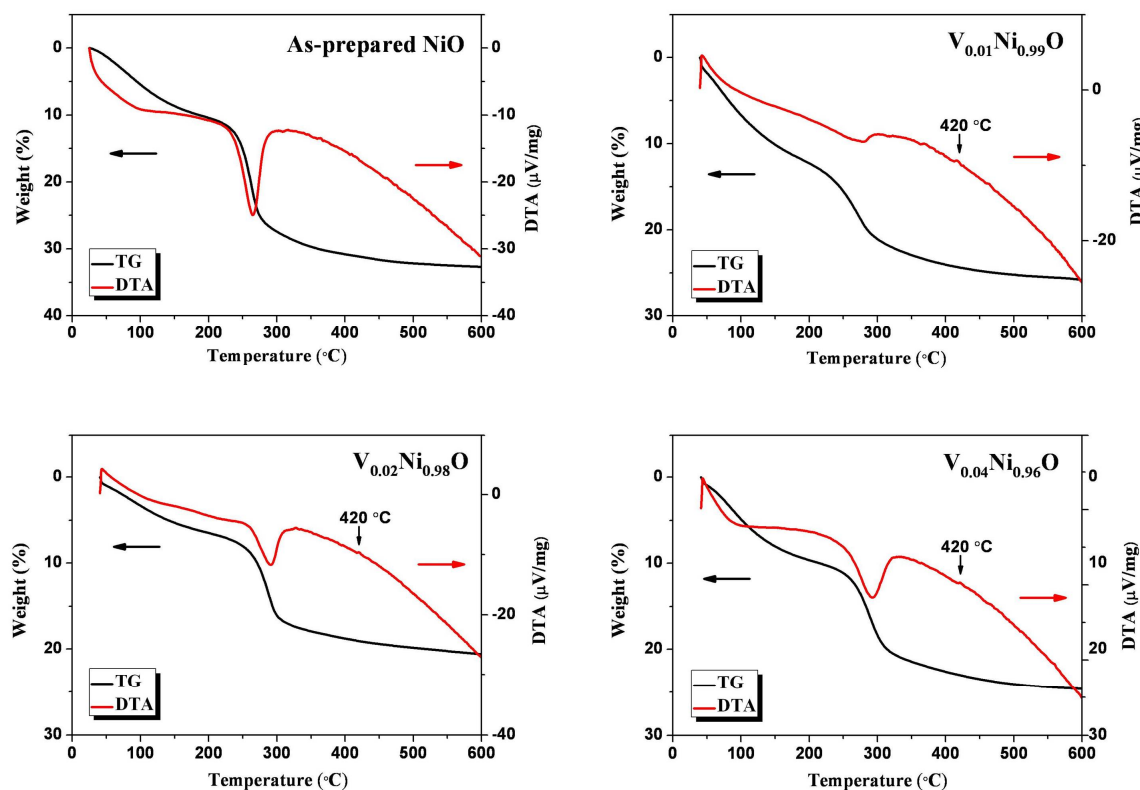

**Fig. S1.** TG-DTA curves of as-prepared NiO and V-doped NiO samples.

For the mixed oxides (Ni-V oxides), the calcinated temperature could be affected by its kinetics of the oxidation of electrode, which is composed of NiO and  $\text{VO}_x$ . From TG-DTA curves (**Fig. S1**), the major weight loss at about 260 and 290 °C for the pure NiO and V-doped NiO, respectively, corresponds to the peak position in DTA curves. For all V-doped NiO samples, a weak and slight exothermic peak related to vanadium oxide is observed at about 420 °C.<sup>24</sup> (T. Watanabe et al., *J. Mater. Chem.*, 1995, **5**, 753) Some papers also reported that vanadium oxide species ( $\text{V}_2\text{O}_3$ ,  $\text{VO}_2$  and  $\text{V}_2\text{O}_5$ ) were prepared by the calcination temperature ( $> 400$  °C). (K. Takahashi et al., *J. Phys. Chem. B*, 2004, **108**, 9795; O. Merdignac-Conanec et al., *J. Solid State Chem.*, 2005, **178**, 218; Y. Zhang et al., *Mater. Res. Bull.*, 2012, 47, 1978) O. Merdignac-Conanec et al. and Y. Zhang et al. reported that vanadium oxide species were crystallized at 450 °C as orthorhombic  $\text{V}_2\text{O}_5$  shcherbinaite with

loss of fibrous structure corresponding to the oxidation of the bulk  $\text{VO}_2$  to  $\text{V}_2\text{O}_5$ , as represented in following Eq:  $4\text{VO}_2 + \text{O}_2 \rightarrow 2\text{V}_2\text{O}_5$ . Layered  $\text{V}_2\text{O}_5$ -like materials show the typical redox intercalation ability for various intercalating species. Moreover, the electrochemical  $\text{K}^+$  insertion process occurring at  $\text{V}_2\text{O}_5$  electrodes can be expressed as  $\text{V}_2\text{O}_5 + x\text{K}^+ + xe^- \leftrightarrow \text{K}_x\text{V}_2\text{O}_5$ . Therefore, it is important that vanadium species are formed as  $\text{V}_2\text{O}_5$  (vanadium oxidation state : +5). This is because  $\text{V}_2\text{O}_5$  is more stable and more excellent electrochemical performance than other vanadium oxide species ( $\text{V}_2\text{O}_3$  and  $\text{VO}_2$ ) for pseudocapacitors. Hence, we choose the 500 °C as the calcine temperature to form  $\text{V}_2\text{O}_5$  with fully oxidation of vanadium species and the decomposition of various organic moieties.

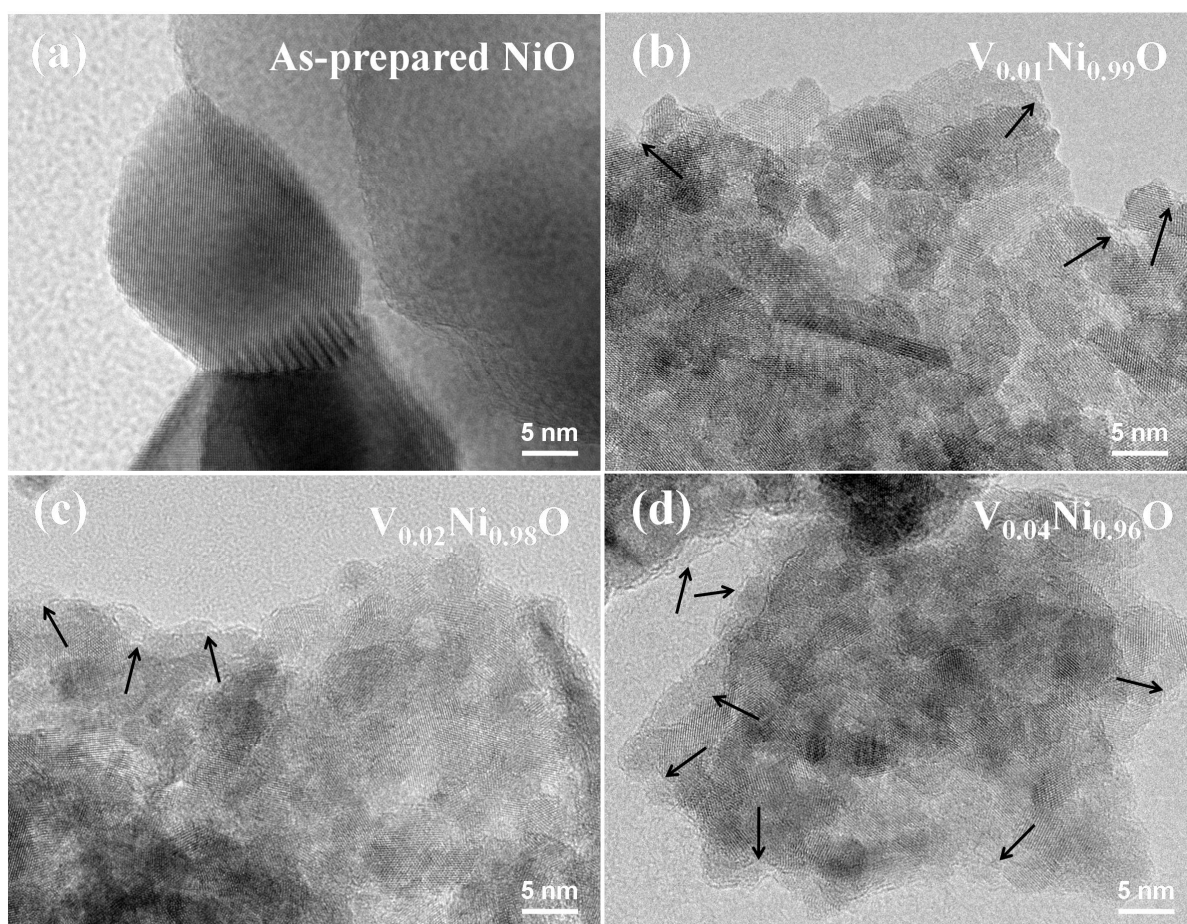

**Fig. S2.** TEM images of as-prepared NiO and V-doped NiO samples.

The oxidation state of vanadium oxide (from  $\text{V}^{5+}$  to  $\text{V}^{4+}$ ) decreased as the at.% of V increased. This indicates that a result of the partial reduction of some  $\text{V}^{5+}$  to  $\text{V}^{4+}$  in  $\text{V}_x\text{Ni}_{1-x}\text{O}$

samples, resulting structural disorder due to the percolation of V on the surface of NiO or the NiO lattice. Through the heat treatment, the percolated V on the surface of NiO or the NiO lattice formed the passivation layer on the surface of NiO. (**Fig. S2b, c, d**) This passivation layer and its thickness, for vanadium dioxide ( $\text{VO}_2$ ,  $\text{V}^{4+}$ ) associated with semiconducting behavior, functioned as leading to low carrier density, resulting large increase of the resistivity under 67 °C. (*S.A. Corr et al., Chem. Mater.*, 2008, **20**, 6396; C. Chen et al., *J. Appl. Phys.*, 2011, **110**, 023707)

## References

- T. Watanabe, A Shimizu and M. Inagaki, *J. Mater. Chem.*, 1995, **5**, 753.
- K. Takahashi, S.J. Limmer, Y. Wang and G. Gao, *J. Phys. Chem. B.*, 2004, **108**, 9795.
- O.Merdrignac-Conanec, K.E. Badraoui and P. L'Haridon, *J. Solid State Chem.*, 2005, **178**, 218
- Y. Zhang, Y. Huang, J. Zhang, W. Wu, F. Niu, Y. Zhong, X. Liu, X. Liu and C. Huang, *Mater. Res. Bull.*, 2012, **47**, 1978.
- S. A. Corr, M. Grossman, J. D. Furman, B. C. Melot, A. K. Cheetham, K. R. Heier and R. Seshadri, *Chem. Mater.*, 2008, **20**, 6396.
- C. Chen, Y. Zhao, X. Pan, V. Kuryatkov, A. Bernussi, M. Holtz and Z. Fan, *J. Appl. Phys.*, 2011, **110**, 023707.
